# Supplementary material for: Benzannulated tris(2-mercapto-1-imidazolyl)hydroborato ligands: tetradentate κ4-S3H binding and access to monomeric monovalent thallium in an [S3] coordination environment
Source: Royal Society of Chemistry journal article supplement (doi:10.1039/c3dt52418c), 2013-11-08
Supplement: c3dt52418c.pdf [file c3dt52418c.pdf]

## SUPPORTING INFORMATION

### **Benzannulated *Tris*(2-mercapto-1-imidazolyl)hydroborato Ligands: Tetradentate $\kappa^4$ - $S_3H$ Binding and Access to Monomeric Monovalent Thallium in an $[S_3]$ Coordination Environment**

Yi Rong, Joshua H. Palmer and Gerard Parkin,\*

*Department of Chemistry,*

*Columbia University,*

*New York, New York 10027, USA.*

*Received xxxx xx, 2013.*

**Table 1.** Cartesian coordinates for geometry optimized structure of  $[\text{Tm}^{\text{Bu}^t\text{Benz}}]\text{Tl}$ .

| [Tm <sup>Bu<sup>t</sup>Benz</sup> ] <sup>+</sup> Tl <sup>-</sup> |              |             |             |
|------------------------------------------------------------------|--------------|-------------|-------------|
| -2831.79567939041 Hartrees                                       |              |             |             |
| Atom                                                             | x            | y           | z           |
| Tl                                                               | -0.006958188 | 10.27295894 | 20.13067065 |
| S                                                                | -2.271690225 | 9.838057642 | 18.37110855 |
| N                                                                | -0.769949132 | 8.973006161 | 16.2631578  |
| N                                                                | -2.121940516 | 7.38283907  | 17.07735336 |
| B                                                                | 0.003978959  | 10.27091241 | 15.87333384 |
| H                                                                | 0.00494627   | 10.26948754 | 14.67165914 |
| C                                                                | -1.706716042 | 8.702401698 | 17.2111248  |
| C                                                                | -0.554611984 | 7.818494721 | 15.51962821 |
| C                                                                | 0.330131643  | 7.60527368  | 14.45858176 |
| H                                                                | 0.976330158  | 8.399615489 | 14.10766447 |
| C                                                                | 0.360488882  | 6.343575876 | 13.87856696 |
| H                                                                | 1.038042795  | 6.147062546 | 13.05302381 |
| C                                                                | -0.471077732 | 5.324872649 | 14.35842666 |
| H                                                                | -0.434791727 | 4.340249864 | 13.90116677 |
| C                                                                | -1.349055891 | 5.533794747 | 15.41887975 |
| H                                                                | -1.958176793 | 4.710272394 | 15.74922982 |
| C                                                                | -1.394380113 | 6.805447918 | 16.01435151 |
| C                                                                | -3.187635436 | 6.735923849 | 17.94616135 |
| C                                                                | -2.711152218 | 6.712376633 | 19.41280691 |
| H                                                                | -2.577830708 | 7.715636737 | 19.81225465 |
| H                                                                | -1.764179567 | 6.168524553 | 19.49272815 |

|   |              |             |             |
|---|--------------|-------------|-------------|
| H | -3.456904672 | 6.190871087 | 20.02193096 |
| C | -3.449261868 | 5.275675457 | 17.54130964 |
| H | -3.81275994  | 5.183389007 | 16.51556057 |
| H | -4.236687572 | 4.89853729  | 18.19975802 |
| H | -2.574144427 | 4.638296313 | 17.68592662 |
| C | -4.519396741 | 7.492686252 | 17.7668194  |
| H | -4.441258484 | 8.537066827 | 18.06358454 |
| H | -5.287695946 | 7.012991754 | 18.3822659  |
| H | -4.842698492 | 7.444775094 | 16.72149011 |
| S | 1.514329873  | 8.527574699 | 18.38163316 |
| N | 1.515571647  | 10.2477123  | 16.26236489 |
| N | 3.56923055   | 9.865535253 | 17.07286198 |
| C | 2.217400388  | 9.573827663 | 17.21290924 |
| C | 2.410194605  | 10.9994385  | 15.50955684 |
| C | 2.154494013  | 11.86436223 | 14.44160227 |
| H | 1.143268004  | 12.03032066 | 14.09300182 |
| C | 3.234459868  | 12.50827099 | 13.85133822 |
| H | 3.067505616  | 13.18648812 | 13.01990061 |
| C | 4.532772992  | 12.29280757 | 14.32829473 |
| H | 5.369380158  | 12.80626166 | 13.86325758 |
| C | 4.788832322  | 11.43620724 | 15.39593932 |
| H | 5.806962592  | 11.31629304 | 15.7238846  |
| C | 3.707747679  | 10.77426141 | 16.00160451 |
| C | 4.661954101  | 9.266783872 | 17.94289704 |
| C | 4.449981152  | 9.703264972 | 19.40691045 |
| H | 3.514355281  | 9.323493775 | 19.81222616 |
| H | 4.451220746  | 10.79587699 | 19.47838067 |

|   |              |             |             |
|---|--------------|-------------|-------------|
| H | 5.275035227  | 9.320184878 | 20.01658728 |
| C | 6.059036484  | 9.760396941 | 17.53011231 |
| H | 6.316310085  | 9.483620748 | 16.50534673 |
| H | 6.778849432  | 9.267882009 | 18.1896706  |
| H | 6.179411555  | 10.83732455 | 17.66696198 |
| C | 4.663441123  | 7.733574444 | 17.77541423 |
| H | 3.717271708  | 7.286917679 | 18.07609755 |
| H | 5.460527405  | 7.308163528 | 18.39419312 |
| H | 4.864847427  | 7.467724028 | 16.73216487 |
| S | 0.760439179  | 12.44918356 | 18.37702245 |
| N | -0.732089007 | 11.59067654 | 16.26057761 |
| N | -1.433232673 | 13.55528069 | 17.07771794 |
| C | -0.501326003 | 12.53355379 | 17.2130394  |
| C | -1.83485926  | 11.98602273 | 15.51280175 |
| C | -2.457276412 | 11.33141694 | 14.44616332 |
| H | -2.093060391 | 10.37454622 | 14.09485625 |
| C | -3.55926473  | 11.94143937 | 13.8607507  |
| H | -4.06450685  | 11.45706118 | 13.03054229 |
| C | -4.024278183 | 13.17153519 | 14.34078792 |
| H | -4.890187256 | 13.63716075 | 13.87897291 |
| C | -3.409042294 | 13.82234204 | 15.40719746 |
| H | -3.815760335 | 14.76285128 | 15.73676113 |
| C | -2.291871917 | 13.21947747 | 16.008909   |
| C | -1.467211082 | 14.79459567 | 17.95612764 |
| C | -1.737927483 | 14.38222009 | 19.41755325 |
| H | -0.93632074  | 13.76673    | 19.82059692 |
| H | -2.680083159 | 13.82836248 | 19.48438869 |

|   |              |             |             |
|---|--------------|-------------|-------------|
| H | -1.827482215 | 15.28404113 | 20.03224853 |
| C | -2.59827184  | 15.75345215 | 17.54894826 |
| H | -2.48877462  | 16.12084084 | 16.52618882 |
| H | -2.536832779 | 16.61984592 | 18.21330399 |
| H | -3.588534871 | 15.31257798 | 17.68292435 |
| C | -0.144413054 | 15.57075657 | 17.79383094 |
| H | 0.718499801  | 14.97856202 | 18.09345052 |
| H | -0.181042503 | 16.47120313 | 18.41595488 |
| H | -0.015280144 | 15.8826992  | 16.75192388 |
